# Supplementary material for: Neutral bis(1,4-diaza-1,3-butadiene)nickel complexes and their corresponding monocations: molecular and electronic structures. A combined experimental and density functional theoretical study
Source: Royal Society of Chemistry journal article supplement (doi:10.1039/b709390j), 2007-01-01

## **SUPPORTING INFORMATION**

### **Neutral Bis(1,4-diaza-1,3-butadiene)nickel Complexes and the Corresponding Monocations: Molecular and Electronic Structures. A Combined Experimental and Density Functional Theoretical Study**

Nicoleta Muresan, Thomas Weyhermüller and Karl Wieghardt\*

<sup>a)</sup> Max-Planck-Institut für Bioorganische Chemie, Stiftstrasse 34-36, D-45470 Mülheim an  
der Ruhr, Germany

1

DFT, BS(2,2),  $M_s = 0$ , B3LYP, Spin-unrestricted Kohn-Sham Functional

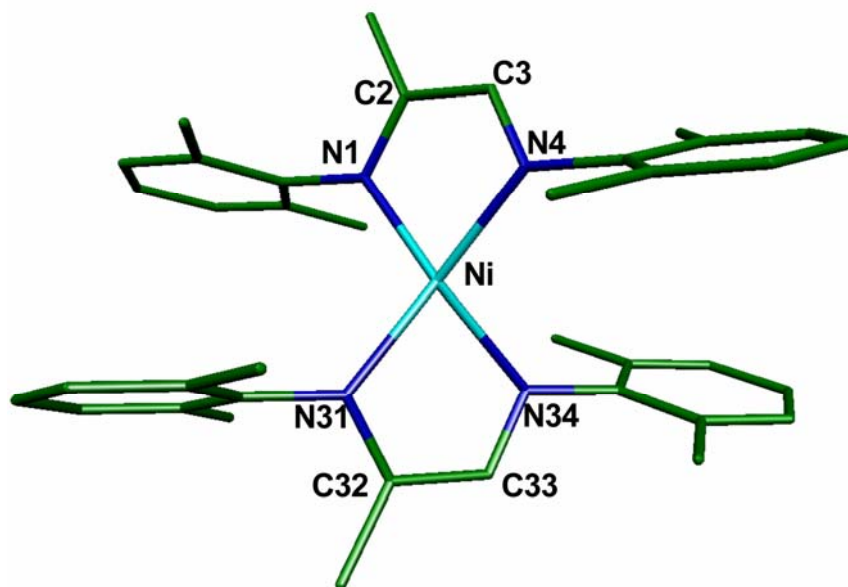

### Bond Lengths

|                       | $[\text{Ni}^{\text{II}}(\text{L}^\bullet)_2]$<br>Expt. | $[\text{Ni}^{\text{II}}(\text{L}^\bullet)_2]$<br>Calcd. |
|-----------------------|--------------------------------------------------------|---------------------------------------------------------|
| Ni1-N1                | 1.9475(14)                                             | 2.060                                                   |
| Ni1-N4                | 1.9206(14)                                             | 2.032                                                   |
| Ni1-N31               | 1.9483(14)                                             | 2.046                                                   |
| Ni1-N34               | 1.9276(14)                                             | 2.043                                                   |
| N1-C2                 | 1.337(2)                                               | 1.325                                                   |
| C2-C3                 | 1.438(2)                                               | 1.420                                                   |
| C3-N4                 | 1.330(2)                                               | 1.324                                                   |
| N31-C32               | 1.338(2)                                               | 1.336                                                   |
| C32-C33               | 1.397(2)                                               | 1.420                                                   |
| C33-N34               | 1.330(2)                                               | 1.324                                                   |
| <b>Dihedral angle</b> | <b>47.9°</b>                                           | <b>47°</b>                                              |

### Spin Density Map

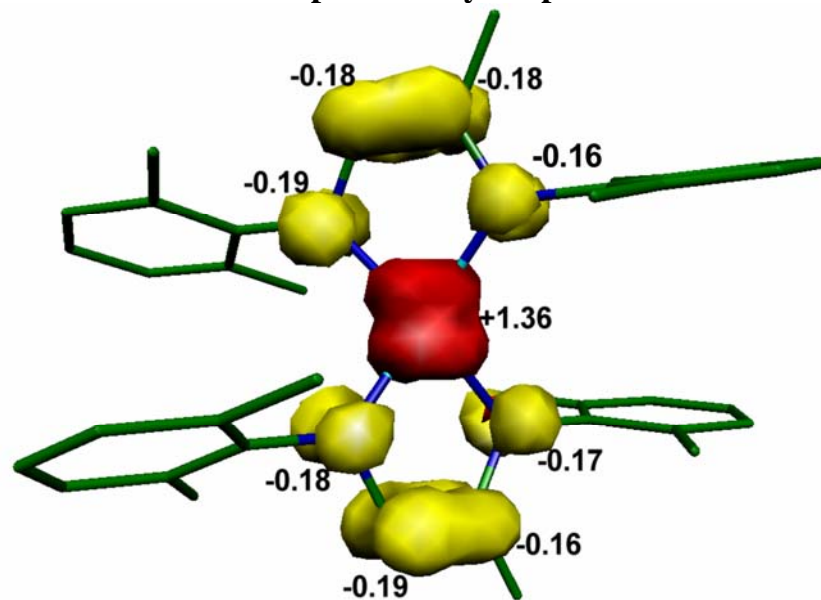

### Mulliken Population Analysis

|     |           |
|-----|-----------|
| Ni  | 1.357906  |
| N31 | -0.166702 |
| C32 | -0.163077 |
| C33 | -0.192871 |
| N34 | -0.177246 |
| N1  | -0.155882 |
| C2  | -0.178488 |
| C3  | -0.175277 |
| N4  | -0.187957 |

## Qualitative MO scheme

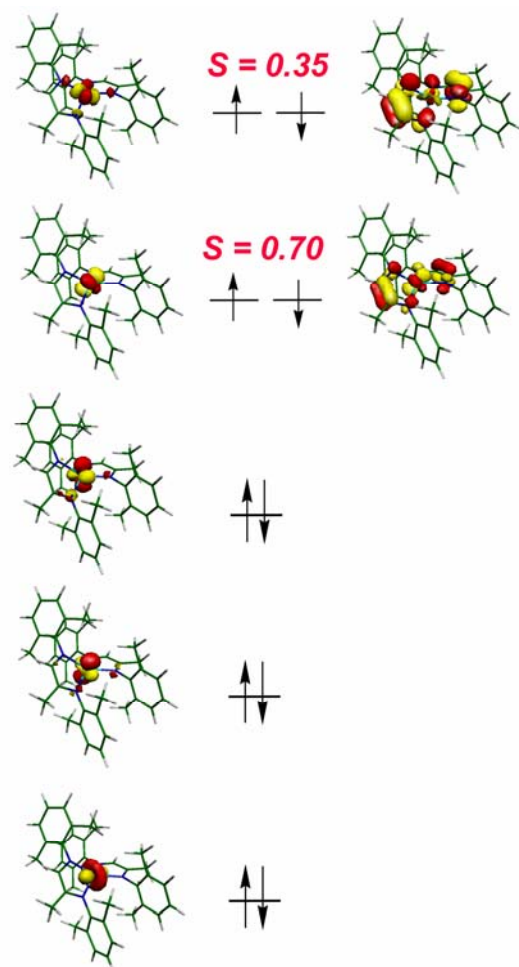

2

DFT, S = 1/2, B3LYP, Spin-unrestricted Kohn-Sham Functional



### Bond Lengths

|                       | $[\text{Ni}^{\text{I}}(\text{L}^{\text{Ox}})_2]^{\text{I}+}$<br>Calcd. |
|-----------------------|------------------------------------------------------------------------|
| Ni1-N1                | 2.095                                                                  |
| Ni1-N4                | 2.086                                                                  |
| Ni1-N31               | 2.088                                                                  |
| Ni1-N34               | 2.093                                                                  |
| N1-C2                 | 1.297                                                                  |
| C2-C3                 | 1.474                                                                  |
| C3-N4                 | 1.288                                                                  |
| N31-C32               | 1.297                                                                  |
| C32-C33               | 1.474                                                                  |
| C33-N34               | 1.288                                                                  |
| <b>Dihedral angle</b> | <b>38°</b>                                                             |

### Spin Density Map

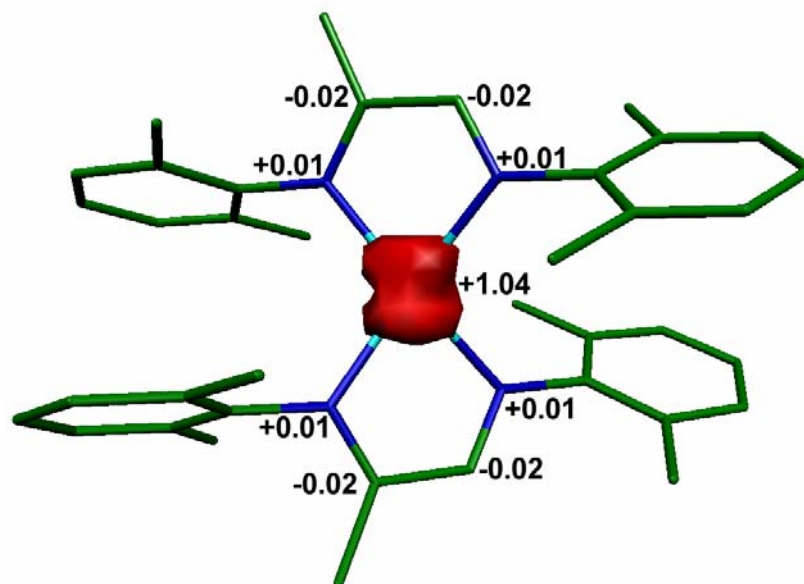

### Mulliken Population Analysis

|     |           |
|-----|-----------|
| Ni  | 1.035113  |
| N31 | 0.013322  |
| C32 | -0.020746 |
| C33 | -0.023622 |
| N34 | 0.011501  |
| N1  | 0.015177  |
| C2  | -0.022630 |
| C3  | -0.019507 |
| N4  | 0.010308  |

## Qualitative MO scheme

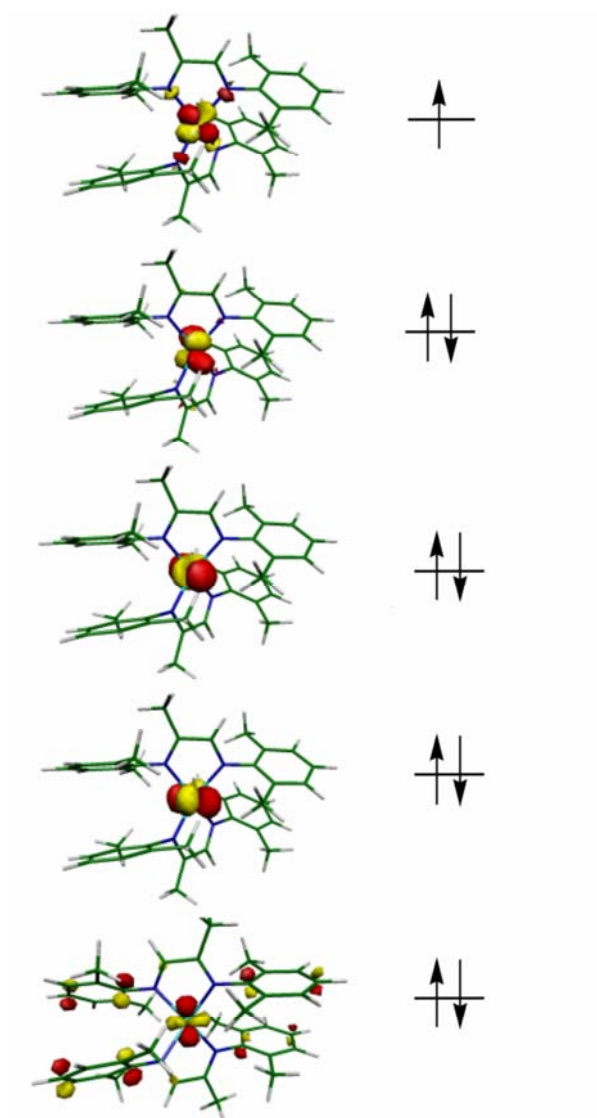

## *g* values (B3LYP)

|        | $g_x$ | $g_y$ | $g_z$ |
|--------|-------|-------|-------|
| Expt.  | 2.040 | 2.10  | 2.26  |
| Calcd. | 2.067 | 2.182 | 2.271 |

## 3

DFT, BS(2,2),  $M_s = 0$ , B3LYP, Spin-unrestricted Kohn-Sham Functional

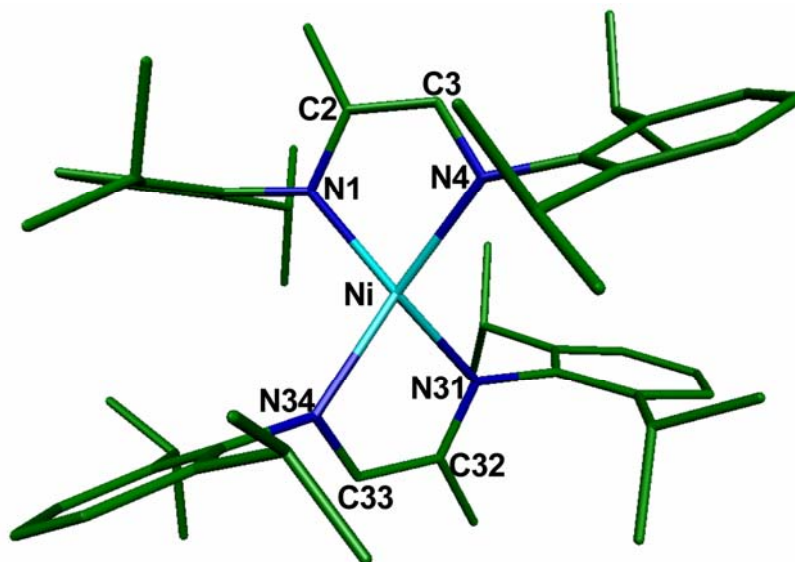

### Bond Lengths

|                       | $[\text{Ni}^{\text{II}}(\overset{\cdot}{\text{L}})_2]$<br>Expt. | $[\text{Ni}^{\text{II}}(\overset{\cdot}{\text{L}})_2]$<br>Calcd. |
|-----------------------|-----------------------------------------------------------------|------------------------------------------------------------------|
| Ni1-N1                | 1.963(2)                                                        | 2.046                                                            |
| Ni1-N4                | 1.999(2)                                                        | 2.140                                                            |
| Ni1-N31               | 1.967(2)                                                        | 2.046                                                            |
| Ni1-N34               | 1.978(2)                                                        | 2.141                                                            |
| N1-C2                 | 1.327(2)                                                        | 1.339                                                            |
| C2-C3                 | 1.402(4)                                                        | 1.419                                                            |
| C3-N4                 | 1.326(2)                                                        | 1.322                                                            |
| N31-C32               | 1.340(2)                                                        | 1.340                                                            |
| C32-C33               | 1.396(2)                                                        | 1.418                                                            |
| C33-N34               | 1.326(3)                                                        | 1.323                                                            |
| <b>Dihedral angle</b> | <b>53°</b>                                                      | <b>52°</b>                                                       |



### Spin Density Map

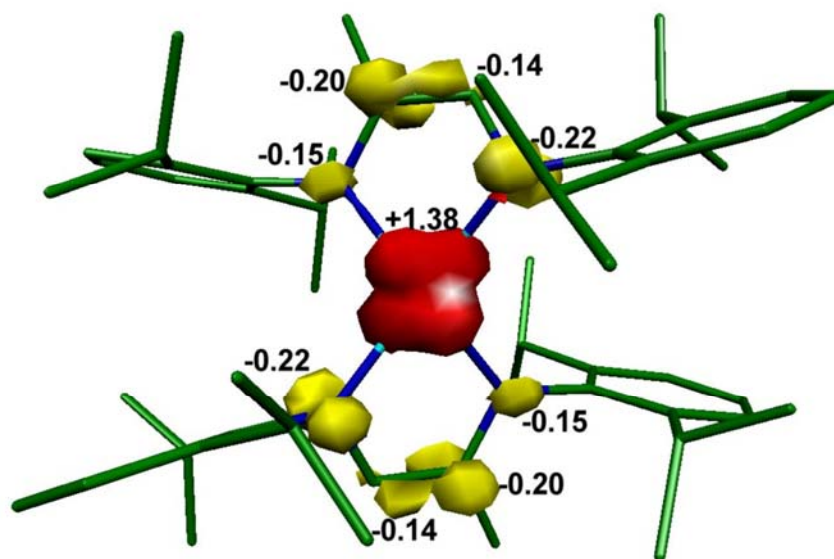

### Mulliken Population Analysis

|     |           |
|-----|-----------|
| Ni  | 1.389523  |
| N31 | -0.147378 |
| N34 | -0.219586 |
| C32 | -0.197509 |
| C33 | -0.144818 |
| N1  | -0.147056 |
| C2  | -0.197715 |
| C3  | -0.144763 |
| N4  | -0.219586 |

## Qualitative MO scheme

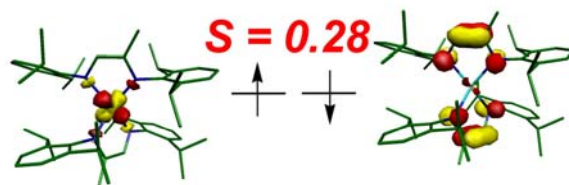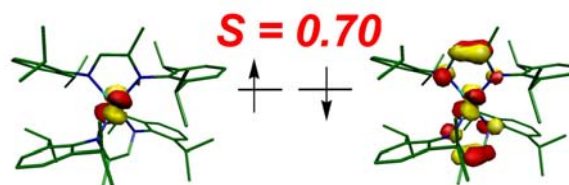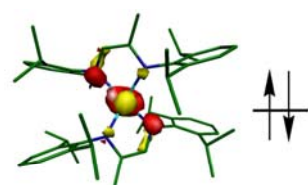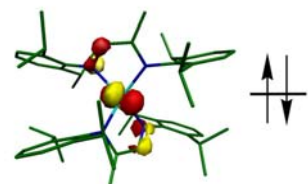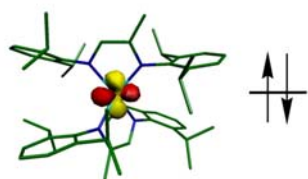

# 4

DFT, S = 1/2, B3LYP, Spin-unrestricted Kohn-Sham Functional

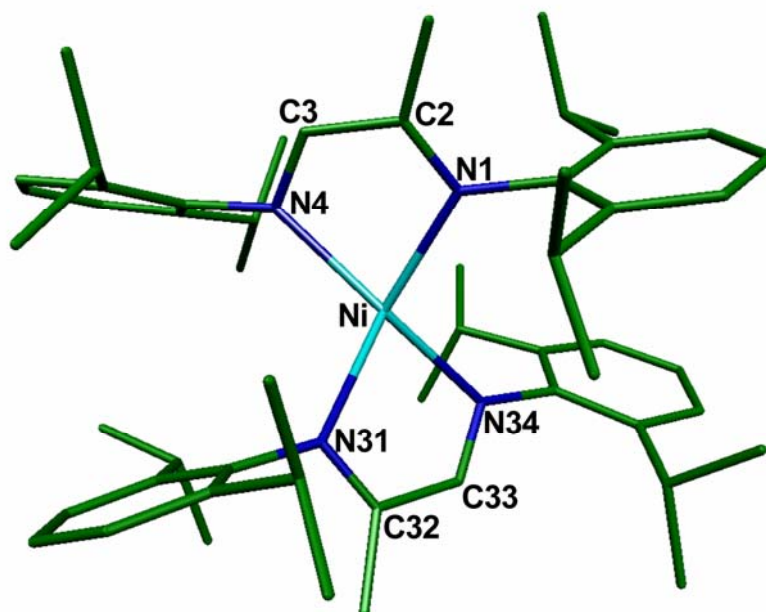

## Bond Lengths

|                       | $[\text{Ni}^{\text{I}}(\text{L}^{\text{Ox}})_2]^{\text{I}+}$ |
|-----------------------|--------------------------------------------------------------|
|                       | Calcd.                                                       |
| Ni1-N1                | 2.144                                                        |
| Ni1-N4                | 2.212                                                        |
| Ni1-N31               | 2.159                                                        |
| Ni1-N34               | 2.191                                                        |
| N1-C2                 | 1.292                                                        |
| C2-C3                 | 1.476                                                        |
| C3-N4                 | 1.280                                                        |
| N31-C32               | 1.294                                                        |
| C32-C33               | 1.474                                                        |
| C33-N34               | 1.281                                                        |
| <b>Dihedral angle</b> | <b>46°</b>                                                   |

### Spin Density Map

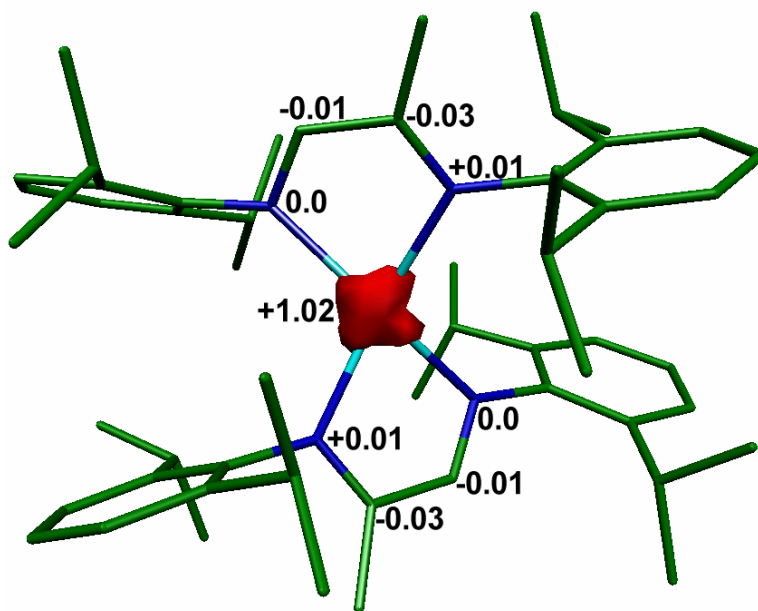

### Mulliken Population Analysis

|     |           |
|-----|-----------|
| Ni  | 1.023380  |
| N31 | 0.014772  |
| N34 | 0.004864  |
| C32 | -0.027899 |
| C33 | -0.012482 |
| N1  | 0.016682  |
| C2  | -0.031362 |
| C3  | -0.009171 |
| N4  | 0.000689  |

### Qualitative MO scheme

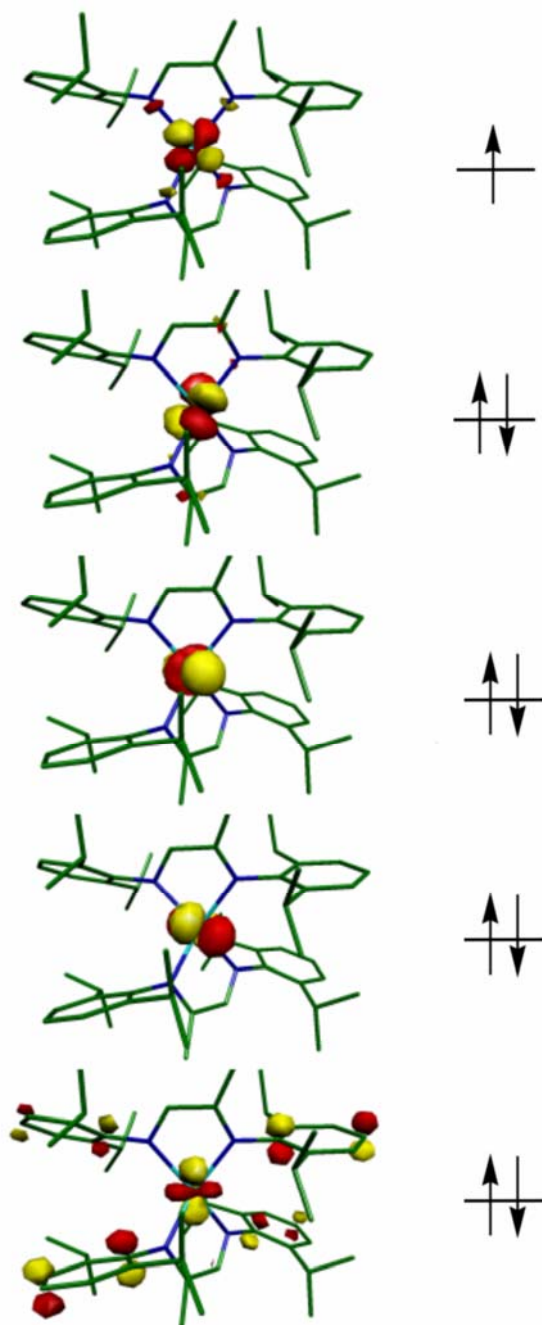

### *g* values (B3LYP)

|       | $g_x$ | $g_y$ | $g_z$ |
|-------|-------|-------|-------|
| Expt. | 2.109 | 2.171 | 2.258 |
| Calcd | 2.095 | 2.181 | 2.258 |

5

DFT, S = 1, B3LYP, Spin-unrestricted Kohn-Sham Functional

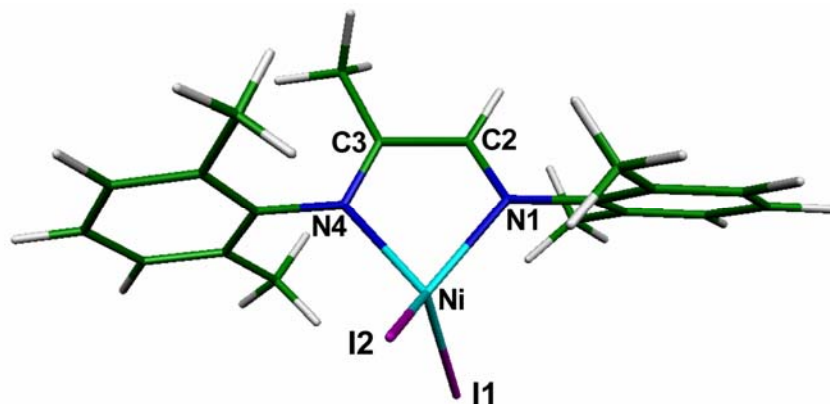

**Bond Lengths**

|        | <b>Expt.</b> | <b>Calcd.</b> |
|--------|--------------|---------------|
| Ni1 N1 | 1.996(16)    | 2.077         |
| Ni1 N4 | 2.008(14)    | 2.080         |
| Ni1 I2 | 2.471(3)     | 2.564         |
| Ni1 I1 | 2.542(3)     | 2.578         |
| N1 C2  | 1.28(2)      | 1.281         |
| C2 C3  | 1.46(3)      | 1.470         |
| C3 N4  | 1.30(2)      | 1.290         |

### Spin Density Map

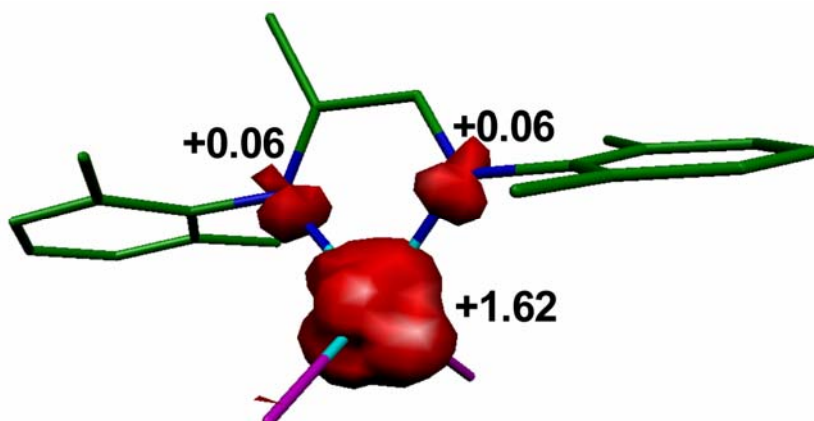

### Mulliken Population Analysis

|    |           |
|----|-----------|
| Ni | 1.619093  |
| I1 | 0.130684  |
| I1 | 0.125165  |
| N4 | 0.063216  |
| C3 | -0.016020 |
| C2 | -0.012576 |
| N1 | 0.056251  |

## Qualitative MO Scheme

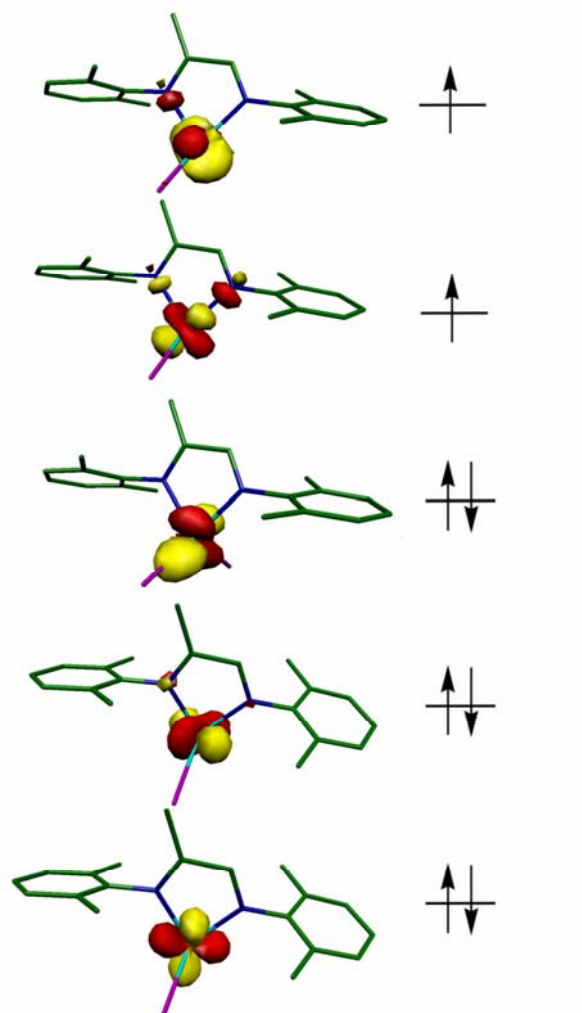

Supplement: b709390j.pdf [file b709390j.pdf]
